# Supplementary material for: Assembly of DNA-functionalized gold nanoparticles studied by UV/Vis-spectroscopy and dynamic light scattering
Source: Royal Society of Chemistry journal article supplement (doi:10.1039/b719762d), 2008-01-01
Supplement: b719762d.pdf [file b719762d.pdf]

## Supporting Information

### Assembly of DNA-Functionalized Gold Nanoparticles studied by UV/Vis-Spectroscopy and Dynamic Light Scattering

Katrin G. Witten, Jan C. Bretschneider, Thomas Eckert, Walter Richtering, and Ulrich Simon

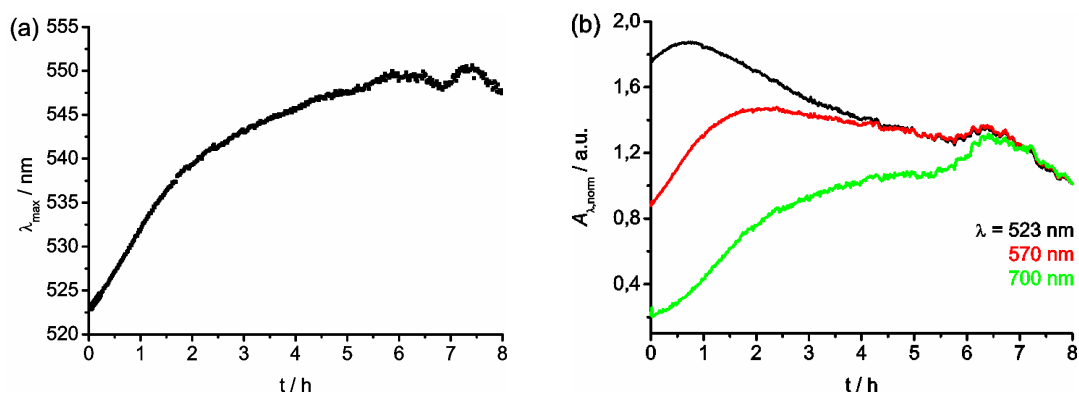

Time dependence of (a)  $\lambda_{\max}$  and (b) the normalized absorbance  $A_{\lambda, \text{norm}}$  at wavelengths  $\lambda$  of 523 nm, 570 nm and 700 nm during the assembly of AuNP-1 and AuNP-2 in ratio 1:1 at 20 °C. The absorbance  $A_{\lambda}$  was scaled to  $A_{\lambda}(8 \text{ h}) = 1$ .
